# Supplementary material for: Genesys-Cat: automatic microkinetic model generation for heterogeneous catalysis with improved Bayesian optimization
Source: Royal Society of Chemistry journal article supplement (doi:10.1039/d4cy01344a), 2025-01-01
Supplement: d4cy01344a2.pdf [file d4cy01344a2.pdf]

# **Genesys-Cat: Automatic Microkinetic Model Generation for Heterogeneous Catalysis with Improved Bayesian Optimization**

Yannick Ureel<sup>1</sup>, Lowie Tomme<sup>1</sup>, Maarten K. Sabbe<sup>1</sup>, Kevin M. Van Geem<sup>1,\*</sup>

<sup>1</sup>Laboratory for Chemical Technology, Department of Materials, Textiles and Chemical Engineering, Ghent University, Technologiepark 125, 9052 Gent, Belgium

\* Corresponding author: [Kevin.VanGeem@UGent.be](mailto:Kevin.VanGeem@UGent.be), Technologiepark 125, 9052 Gent, Belgium;

## **Supporting Information**

## S1. Considered Reaction Families

A total of 23 reaction families are considered for the modelling of the catalytic cracking of iso-octane. These are presented below with an example reaction for illustration.

### 1/ Physisorption of alkanes

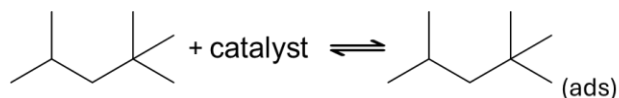

### 2/ Physisorption of alkenes

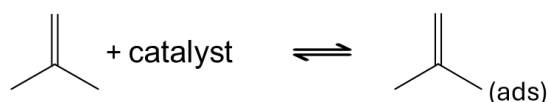

### 3/ Protolytic scission (primary ion product)

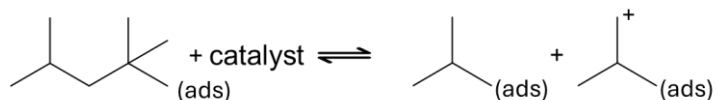

### 4/ Protolytic scission (secondary ion product)

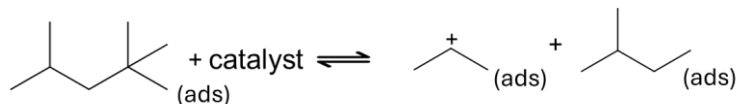

### 5/ Protolytic scission (tertiary ion product)

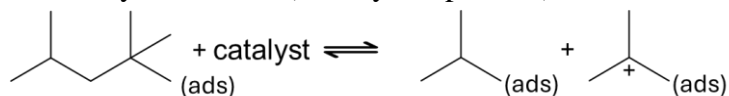

### 6/ Protonation olefins (secondary ion product)

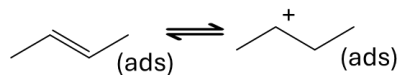

### 7/ Protonation olefins (tertiary ion product)

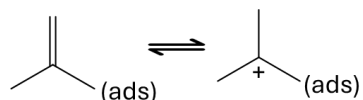

8/  $\beta$ -scission (primary ion product)

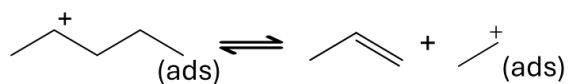

9/  $\beta$ -scission (secondary ion reactant, secondary ion product)

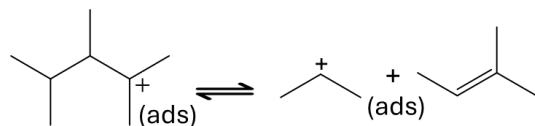

10/  $\beta$ -scission (secondary ion reactant, tertiary ion product)

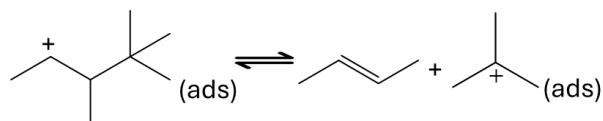

11/  $\beta$ -scission (tertiary ion reactant, secondary ion product)

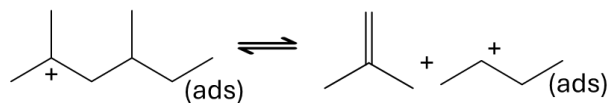

12/  $\beta$ -scission (tertiary ion reactant, tertiary ion product)

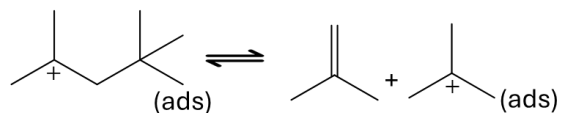

13/ PCP-Branching (secondary ion reactant, secondary ion product)

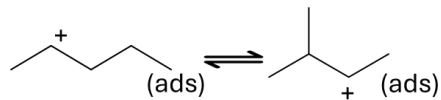

14/ 1,2-Intramolecular hydrogen-shift (secondary ion reactant, secondary ion product)

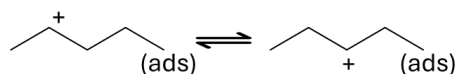

15/ 1,2-Intramolecular hydrogen-shift (tertiary ion reactant, secondary ion product)

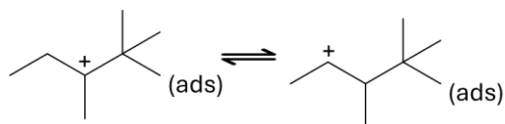

16/ 1,2-Intramolecular hydrogen-shift (secondary ion reactant, tertiary ion product)

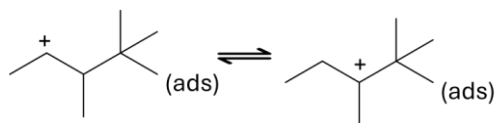

17/ 1,2-Intramolecular hydrogen-shift (tertiary ion reactant, tertiary ion product)

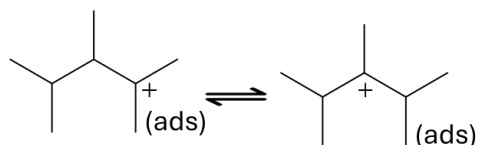

18/ 1,2-Intramolecular methyl-shift (secondary ion reactant, secondary ion product)

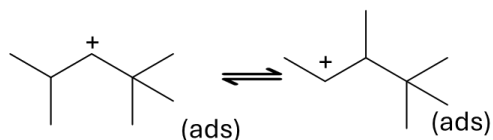

19/ 1,2-Intramolecular methyl-shift (tertiary ion reactant, secondary ion product)

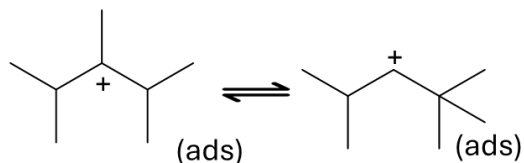

20/ 1,2-Intramolecular methyl-shift (secondary ion reactant, tertiary ion product)

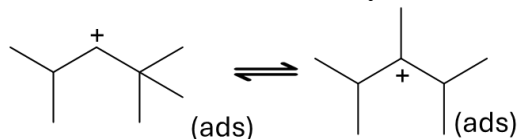

21/ 1,2-Intramolecular methyl-shift (tertiary ion reactant, tertiary ion product)

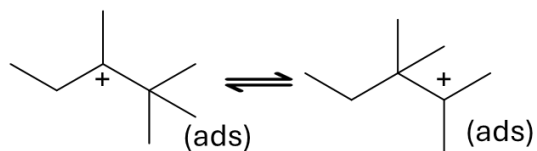

22/ Intermolecular hydrogen abstraction (secondary product)

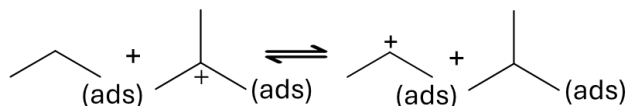

23/ Intermolecular hydrogen abstraction (tertiary product)

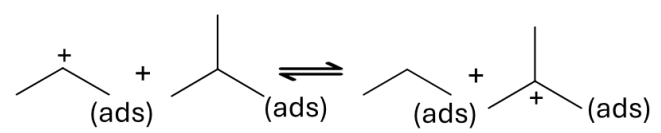

## S2. Catalyst Properties for Iso-octane Cracking

Zeolite properties including Si/Al-ratios, concentration of acid sites ( $C_t$ ) measured by  $\text{NH}_3$ -TPD, internal catalyst area ( $S_{\text{BET}}$ ) and micropore volume ( $V_{\text{micro}}$ ). More information on the zeolite characterization can be found in the work of Van Borm et al. [1].

Table S1. Zeolite properties as reported in [1].

| Zeolite (Topology) | Si/Al <sub>bulk</sub> | Si/Al <sub>frame</sub> | $C_t$<br>(mol kg <sub>cat</sub> <sup>-1</sup> ) | $S_{\text{BET}}$<br>(m <sup>2</sup> g <sub>cat</sub> <sup>-1</sup> ) | $V_{\text{micro}}$<br>(cm <sup>3</sup> g <sub>cat</sub> <sup>-1</sup> ) |
|--------------------|-----------------------|------------------------|-------------------------------------------------|----------------------------------------------------------------------|-------------------------------------------------------------------------|
| LZY20 (FAU)        | 2.6                   | 30.0                   | 0.99                                            | 481                                                                  | 0.19                                                                    |
| CBV720 (FAU)       | 15                    | 16.0                   | 0.60                                            | 673                                                                  | 0.27                                                                    |
| CBV760 (FAU)       | 30                    | 100                    | 0.23                                            | 526                                                                  | 0.25                                                                    |

### S3. Parameter Ranges of the Activation Entropy Estimation

Table S2. Employed parameter ranges of the activation entropy for Levenberg-Marquardt and Bayesian optimization.

|                         | $\Delta^\ddagger S$ [J mol <sup>-1</sup> K <sup>-1</sup> ] |                         | $\Delta^\ddagger S$ [J mol <sup>-1</sup> K <sup>-1</sup> ] |
|-------------------------|------------------------------------------------------------|-------------------------|------------------------------------------------------------|
| Physisorption (alkanes) | -190 to -100                                               | Physisorption (alkenes) | -190 to -100                                               |
| Protolytic scission (p) | -180 to -110                                               | $\beta$ -scission (p)   | -120 to 0                                                  |
| Protolytic scission (s) | -180 to -110                                               | $\beta$ -scission (s,s) | -120 to 0                                                  |
| Protolytic scission (t) | -180 to -110                                               | $\beta$ -scission (s,t) | -120 to 0                                                  |
| Hydride-transfer (s)    | -100 to 50                                                 | $\beta$ -scission (t,s) | -120 to 0                                                  |
| Hydride-transfer (t)    | -100 to 50                                                 | $\beta$ -scission (t,t) | -120 to 0                                                  |

## S4. Pre-exponential Factors of the CBV720 and CBV760 Kinetic Model

Table S3. Pre-exponential factors optimized by improved Bayesian optimization for CBV720

|                         | A [s <sup>-1</sup> ]     |                         | A [s <sup>-1</sup> ]     |
|-------------------------|--------------------------|-------------------------|--------------------------|
| Physisorption (alkanes) | 1.81 10 <sup>1</sup> (*) | Physisorption (alkenes) | 3.15 10 <sup>2</sup> (*) |
| Protolytic scission (p) | 5.23 10 <sup>6</sup>     | β-scission (p)          | 8.66 10 <sup>7</sup>     |
| Protolytic scission (s) | 7.86 10 <sup>5</sup>     | β-scission (s,s)        | 3.78 10 <sup>7</sup>     |
| Protolytic scission (t) | 8.86 10 <sup>5</sup>     | β-scission (s,t)        | 1.63 10 <sup>11</sup>    |
| Hydride-transfer (s)    | 2.43 10 <sup>4</sup>     | β-scission (t,s)        | 1.12 10 <sup>9</sup>     |
| Hydride-transfer (t)    | 2.07 10 <sup>6</sup>     | β-scission (t,t)        | 1.59 10 <sup>9</sup>     |

(\*) [l mol<sup>-1</sup> s<sup>-1</sup>]

Table S4. Pre-exponential factors optimized by improved Bayesian optimization for CBV760

|                         | A [s <sup>-1</sup> ]     |                         | A [s <sup>-1</sup> ]     |
|-------------------------|--------------------------|-------------------------|--------------------------|
| Physisorption (alkanes) | 1.81 10 <sup>1</sup> (*) | Physisorption (alkenes) | 3.15 10 <sup>2</sup> (*) |
| Protolytic scission (p) | 5.23 10 <sup>6</sup>     | β-scission (p)          | 1.58 10 <sup>8</sup>     |
| Protolytic scission (s) | 7.86 10 <sup>5</sup>     | β-scission (s,s)        | 3.78 10 <sup>7</sup>     |
| Protolytic scission (t) | 8.86 10 <sup>5</sup>     | β-scission (s,t)        | 1.63 10 <sup>11</sup>    |
| Hydride-transfer (s)    | 1.19 10 <sup>4</sup>     | β-scission (t,s)        | 1.12 10 <sup>9</sup>     |
| Hydride-transfer (t)    | 1.01 10 <sup>6</sup>     | β-scission (t,t)        | 1.59 10 <sup>9</sup>     |

(\*) [l mol<sup>-1</sup> s<sup>-1</sup>]



## S5. Reaction Families for Coupled Gas and Surface Phase Mechanism of Thermal and Catalytic 1-Butene Cracking

A total of 13 reaction families are considered for the modelling of the thermal and catalytic cracking of 1-butene. These are presented below with an example reaction for illustration.

### 1/ Hydride abstractions to a carbon centered group by a carbon centered radical (gas-phase)

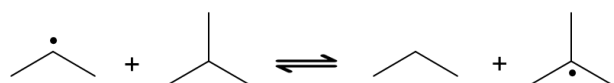

### 2/ Hydride abstractions to a carbon centered group by a hydrogen radical (gas-phase)

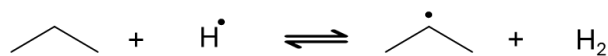

### 3/ Carbon-Centered Radical Addition (gas-phase)

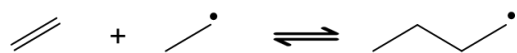

### 4/ Hydrogen Radical Addition (gas-phase)

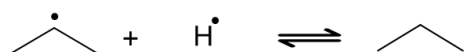

### 5/ Physisorption of alkanes (surface-phase)

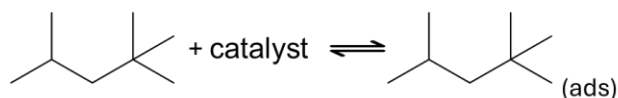

### 6/ Physisorption of alkenes (surface-phase)

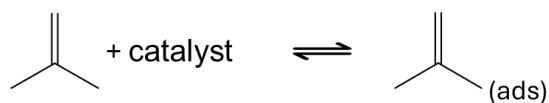

### 7/ Protolytic scission (primary ion product) (surface-phase)

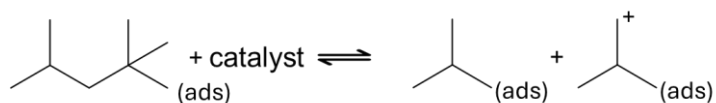

8/ Protolytic scission (secondary ion product) (surface-phase)

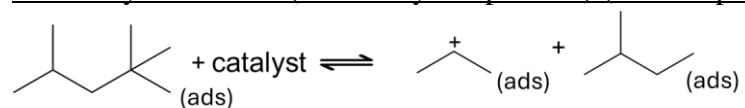

9/ Protonation olefins (secondary ion product) (surface-phase)

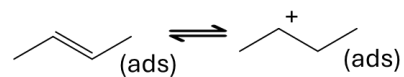

10/ Protonation olefins (tertiary ion product) (surface-phase)

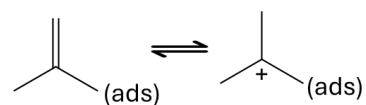

11/ PCP-Branching (surface-phase)

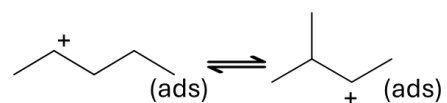

12/ Intermolecular hydrogen abstraction (secondary product) (surface-phase)

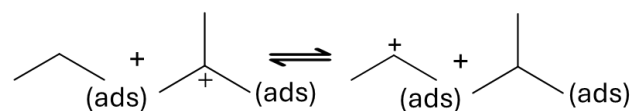

13/ Intermolecular hydrogen abstraction (tertiary product) (surface-phase)

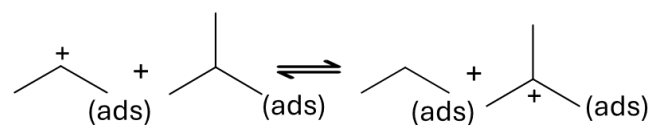

## S6. Residual Conversion with Varying Temperature

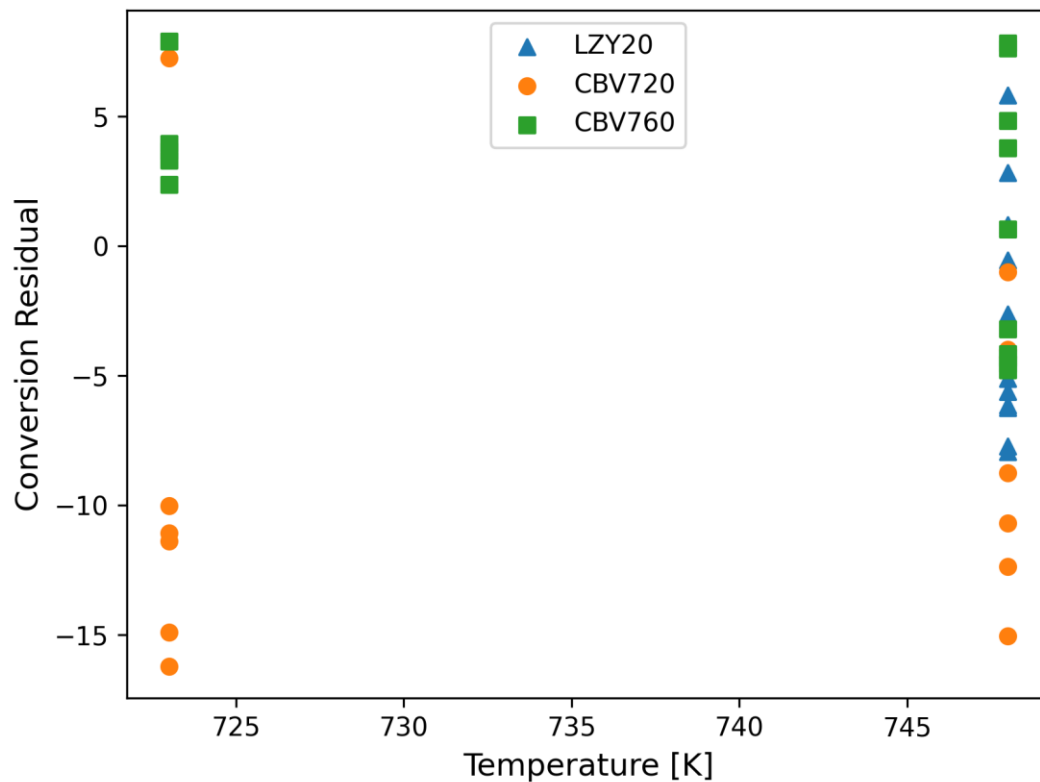

Figure S1. Residual conversion defined as difference between predicted and experimental conversion with varying temperature.

## S7. Experimental and Predict Molar Selectivities of Other Products

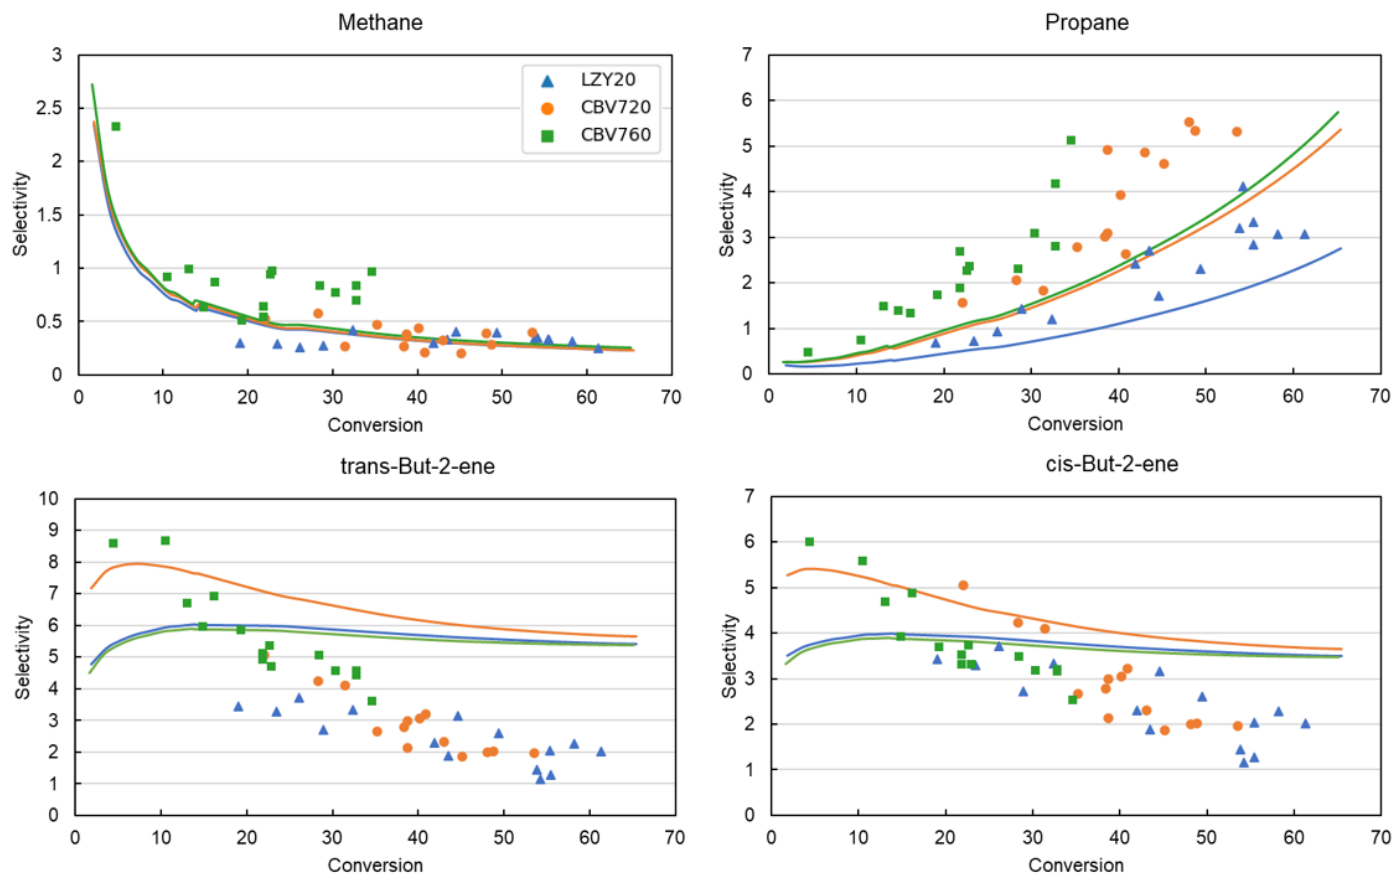

Figure S2. Experimental (markers) vs. predicted (lines) selectivities of methane, propane, trans-but-2-ene, and cis-but-2-ene for iso-octane catalytic cracking in LZY20, CBV720 and CBV760 as function of conversion.

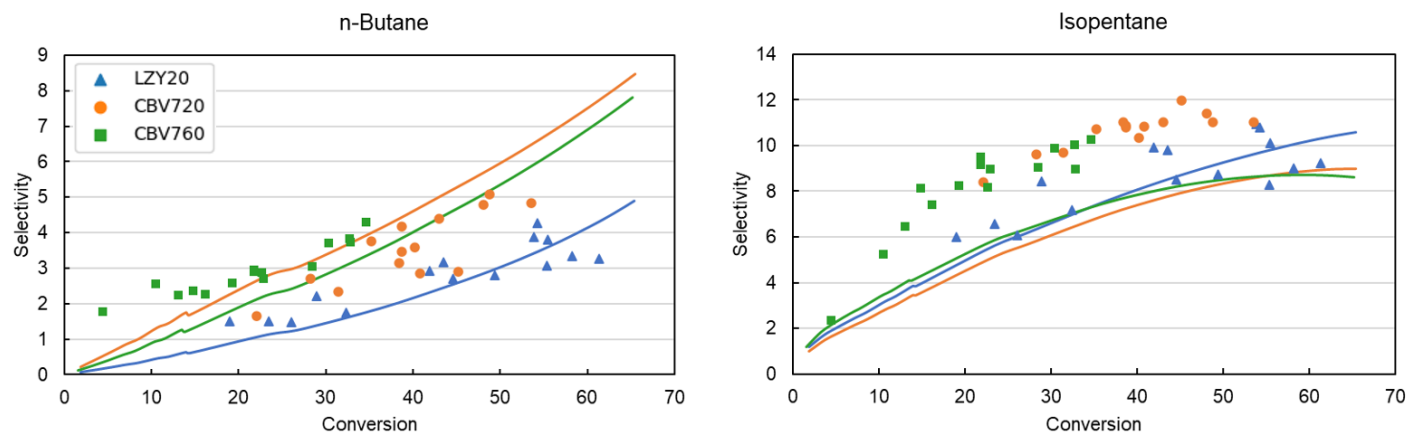

Figure S3. Experimental (markers) vs. predicted (lines) selectivities of n-butane and isopentane for iso-octane catalytic cracking in LZY20, CBV720 and CBV760 as function of conversion.

## References

- [1] Van Borm R, Aerts A, Reyniers M-F, Martens JA, Marin GB. Catalytic cracking of 2, 2, 4-trimethylpentane on FAU, MFI, and bimodal porous materials: influence of acid properties and pore topology. *Industrial & engineering chemistry research* 2010;49(15):6815-23.
